# Supplementary material
Source: publisher site journal article supplement (https://www.dovepress.com/article/219125)
Supplement: Supplementary file 1 [file get_supplementary_file.php]

**Influence of respiratory mechanics on diaphragmatic dysfunction in COPD patients who have failed non-invasive mechanical ventilation**

**Supplementary materials**

**Calculation of physiological measures**

**Static respiratory mechanics**

All measurements of static respiratory mechanics were performed after 30 minutes of constant flow mechanical ventilation with PEEP = 0 cmH2O (ZEEP). The value of pressures were obtained during baseline ventilation with an airway occlusion at the end of expiration pressing the end-expiratory hold, until reaching a plateau pressure, and successively performing a similar procedure with an end-inspiratory occlusion. During the procedure, occlusions that did not produce a clean plateau were discarded (i.e., measures in which the airway pressure is not flat and has oscillations greater than 2-3 CmH2O).

**Airway driving pressure =** End-inspiratory plateau pressure – end-expiratory airway pressure

Paw = Pplat – PEEPtot

**Tidal variation in esophageal pressure =** End-inspiratory esophageal pressure – end-expiratory esophageal pressure

Pes = Pes EI – PesEE

**Transpulmonary driving pressure =** Airway driving pressure – tidal variation in esophageal pressure

PL = Paw - Pes

**Respiratory system elastance =** Airway driving pressure/tidal volume

Ers = Paw/VT

**Chest wall elastance =** Tidal variation in esophageal pressure/tidal volume

Ecw = Pes/VT

**Lung elastance =** Transpulmonary driving pressure/tidal volume

EL = PL/VT

**Airways resistance =** (Peak airway pressure – plateau pressure)/flow

(PIP – Pplat) / V*

**Measurement of End Expiratory Lung Volume (EELV)**

The EELV measure was based on the nitrogen washout/washin technique through dedicated software (FRC Inview, GE Healthcare). The principle of this technique is as follows: The volume of lung gas includes a volume of nitrogen (V (1) N2) that is determined by alveolar fraction of nitrogen (FAN2(1)) and by the EELV:

V(1)N2 = FAN2(1) X EELV

The alveolar fraction of nitrogen can change by changing the administered FiO2 (FAN2(2)), resulting in a new volume of nitrogen (V(2)N2) in the lung after a period of balance.

V(2)N2 = FAN2(2) X EELV

Assuming that after the change of FiO2 the EELV does not change, until a new balance of the alveolar gas is reached, the following equation can be written:

V(1)N2 – V(2)N2 = (FAN2(2) –FAN2(1)) X EELV

As the changes in FAN2are specular to the changes in FiO2 the EELV can be calculated as:

EELV = ΔN2(ml)/ΔFiO2

Where N2 is equal to the exhaled nitrogen after the change of FiO2 once an equilibrium has been reached (20 breaths).

The algorithm used by the Engstrom Carestation (FRC Inview, GE Healthcare) employs tidal concentration of oxygen and carbon dioxyde to get an estimate of nitrogen concentration in expired and inspired air. For more details see the reference in the paper (15). All measurements of the EELV were performed with the patient in a semirecumbent position, after 30 minutes of controlled ventilation with ZEEP.

**Dynamic respiratory measurements**

Dynamic measurements were obtained after 30 minutes of spontaneous breath trials in patients who had met the inclusion criteria. The maximal transdiaphragmatic pressure was obtained by means of a sniff maneuver by applying the following formula:

**Transdiaphragmatic pressure** **=** abdominal pressure – esophageal pressure

Pdi = Pga – Pes

**Transdiaphragmatic pressure/Maximal transdiaphragmatic pressure** = transdiaphragmatic pressure at tidal volume/ transdiaphragmatic pressure obtained by means of a sniff maneuver

Pdi/Pdi sniff

**Dynamic intrinsic positive end-expiratory pressure** (PEEPidyn) was estimated from the decrease in pleural pressure (Ppl) preceding the start of the inspiratory flow and was corrected for the activity of the expiratory muscles by subtracting the negative deflection of the abdominal pressure (Pab).
